# Supplementary material for: Centrifugation-Assisted Solid-Phase Extraction Coupled with UPLC-MS/MS for the Determination of Mycotoxins in ARECAE Semen and Its Processed Products
Source: MDPI journal article supplement (doi:10.3390/toxins14110742), 2022-10-29
Supplement: s1 [file s1]

# Supplementary Materials

## Centrifugation-Assisted Solid-Phase Extraction Coupled with UPLC-MS/MS for the Determination of Mycotoxins in ARECAE Semen and Its Processed Products

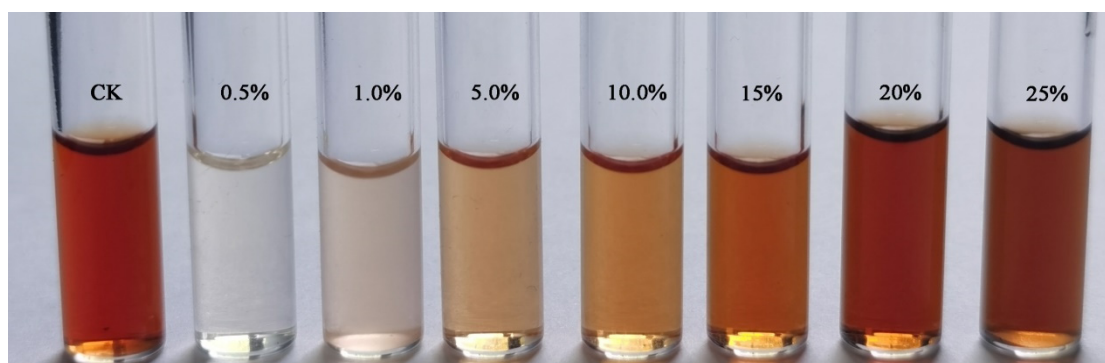

**Figure S1.** Effect of different concentrations of acetic acid on the color of SPE purified solution.

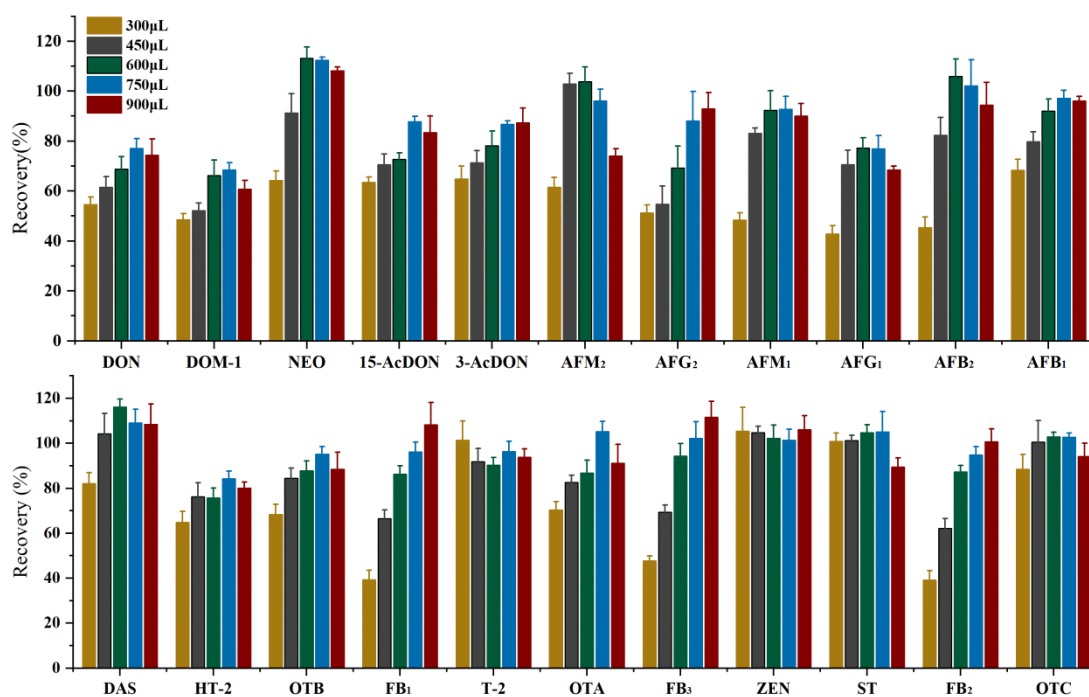

**Figure S2.** Effect of SPE loading volumes on the recoveries of selected mycotoxins.

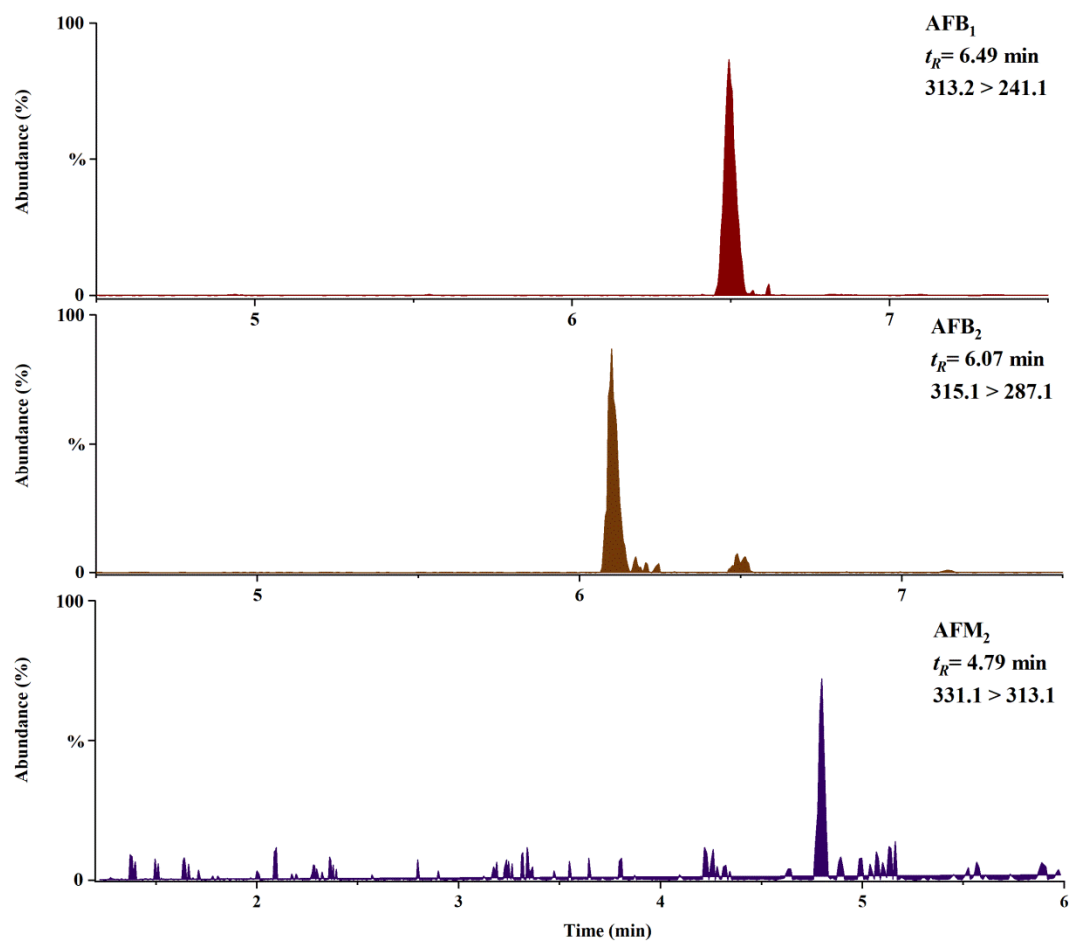

Figure S3. MRM chromatograms of positive WBL-4 sample

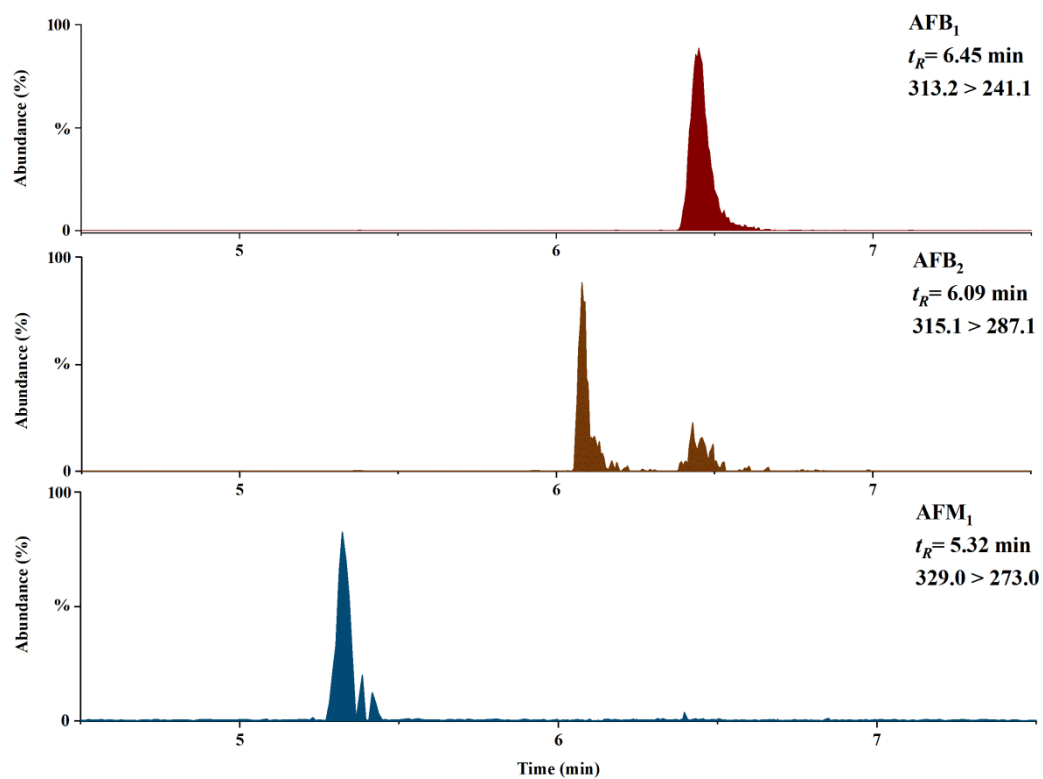

Figure S4. MRM chromatograms of positive BLS-2 sample

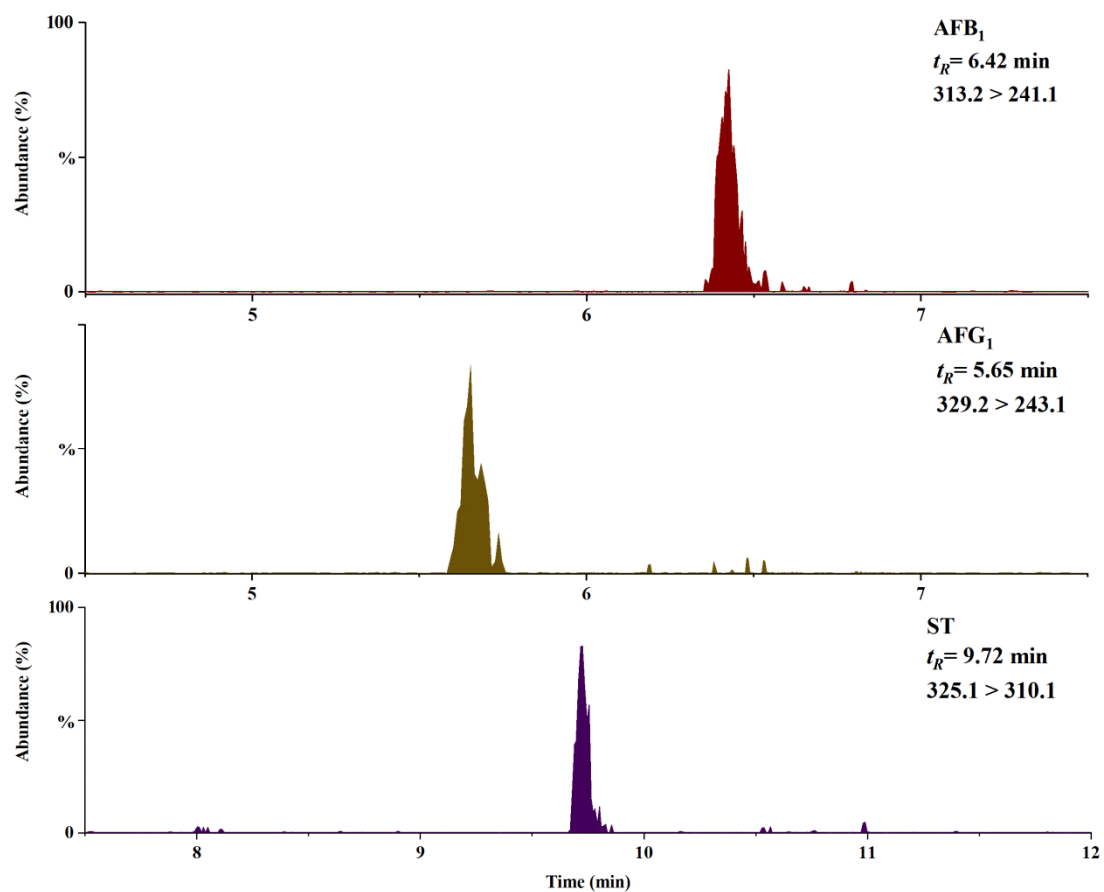

Figure S5. MRM chromatograms of positive BLS-15 sample

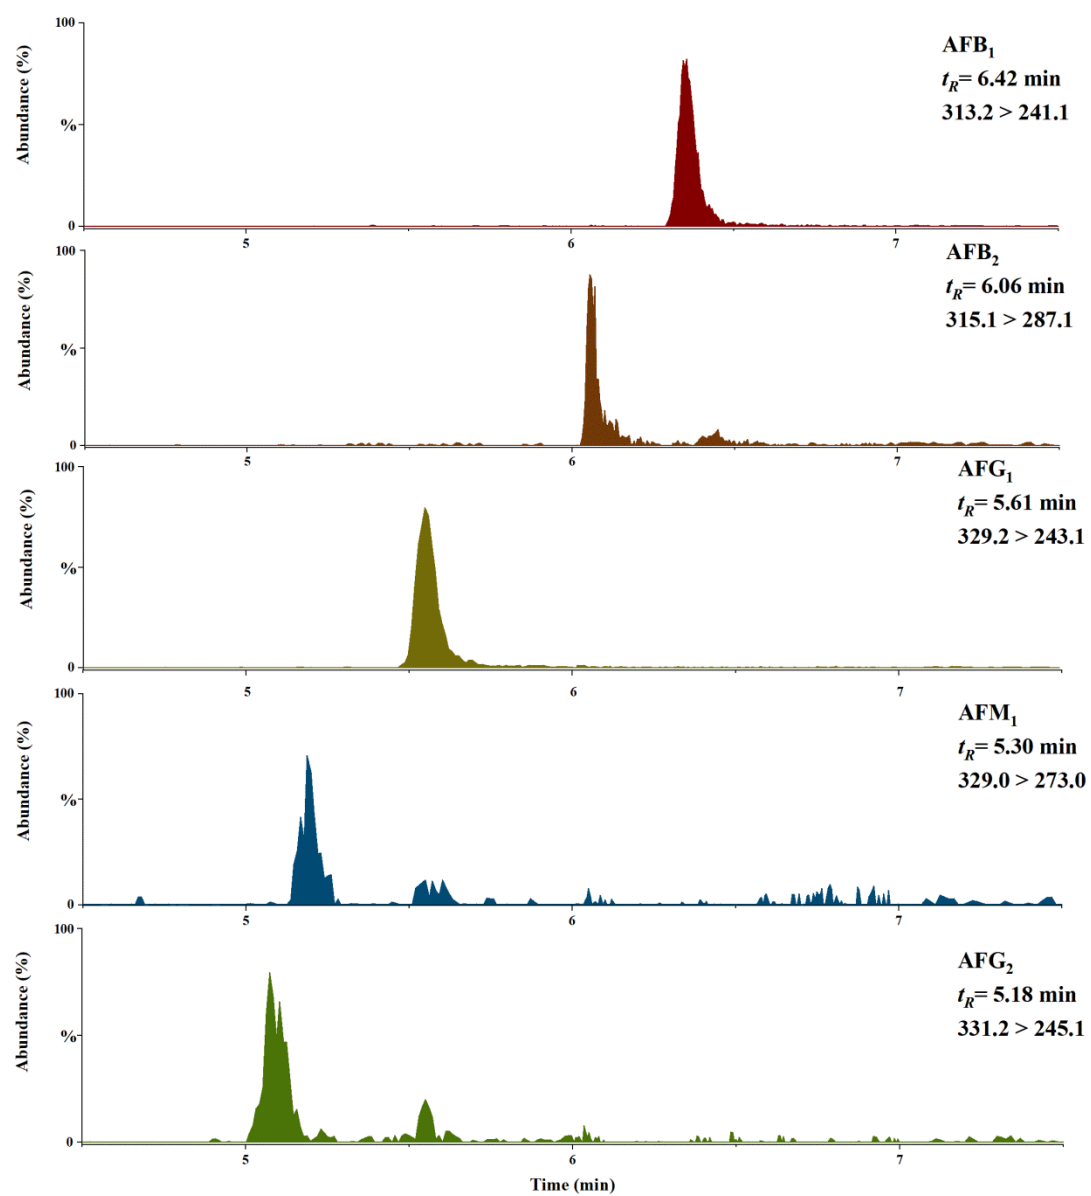

Figure S6. MRM chromatograms of positive JBL-15 sample

**Table S1.** Recoveries of selected mycotoxins in WBL, JBL and DFP

| Mycotoxins       | WBL          |         | JBL          |         | DFP          |         |
|------------------|--------------|---------|--------------|---------|--------------|---------|
|                  | Recovery (%) | RSD (%) | Recovery (%) | RSD (%) | Recovery (%) | RSD (%) |
| DON              | 72.87        | 8.09    | 67.45        | 7.41    | 70.88        | 8.74    |
| DOM-1            | 73.46        | 8.43    | 70.04        | 5.76    | 65.33        | 9.42    |
| NEO              | 103.42       | 9.78    | 108.44       | 10.73   | 112.87       | 7.76    |
| 3-AcDON          | 89.36        | 5.77    | 92.14        | 7.56    | 93.87        | 3.93    |
| 15-AcDON         | 84.05        | 5.85    | 94.33        | 4.68    | 103.49       | 7.16    |
| AFM <sub>2</sub> | 91.06        | 5.47    | 88.67        | 3.84    | 90.67        | 7.28    |
| AFG <sub>2</sub> | 90.81        | 6.59    | 82.45        | 7.15    | 79.58        | 3.09    |
| AFM <sub>1</sub> | 86.04        | 3.52    | 88.39        | 5.78    | 84.67        | 5.47    |
| AFG <sub>1</sub> | 74.16        | 6.44    | 72.61        | 8.42    | 75.38        | 12.37   |
| AFB <sub>2</sub> | 96.14        | 3.76    | 95.08        | 3.86    | 92.76        | 8.94    |
| AFB <sub>1</sub> | 103.60       | 4.28    | 107.21       | 4.36    | 111.87       | 7.44    |
| DAS              | 107.99       | 13.87   | 102.59       | 9.82    | 109.43       | 10.84   |
| HT-2             | 77.93        | 6.08    | 84.42        | 6.53    | 92.69        | 8.67    |
| OTB              | 96.49        | 4.38    | 88.86        | 6.25    | 94.51        | 3.64    |
| FB <sub>1</sub>  | 88.54        | 11.73   | 90.08        | 5.29    | 81.35        | 6.85    |
| T-2              | 95.56        | 3.79    | 89.74        | 6.58    | 93.27        | 4.09    |
| OTA              | 95.79        | 8.72    | 99.07        | 9.03    | 94.23        | 5.13    |
| FB <sub>3</sub>  | 84.79        | 12.19   | 87.46        | 10.54   | 79.59        | 9.45    |
| ZEN              | 90.77        | 5.47    | 105.74       | 8.53    | 103.43       | 3.38    |
| ST               | 99.53        | 4.39    | 103.46       | 5.57    | 98.82        | 4.19    |
| FB <sub>2</sub>  | 96.37        | 6.24    | 98.89        | 8.11    | 77.58        | 8.49    |
| OTC              | 106.24       | 7.68    | 103.87       | 11.67   | 96.54        | 7.23    |

Spike level: 5.0 µg/kg for AFB<sub>1</sub>, AFB<sub>2</sub>, AFG<sub>1</sub>, AFG<sub>2</sub>, AFM<sub>1</sub>, and AFM<sub>2</sub>; 25.0 µg/kg for OTA, OTB, and OTC; 50.0 µg/kg for DON, DOM-1, HT-2, T-2, ST, ZEN, 15-Ac DON, 3-Ac DON NEO, and DAS; and 125.0 µg/kg for FB<sub>1</sub>, FB<sub>2</sub>, and FB<sub>3</sub>
